# Supplementary material for: Thermodynamics and performance of the Mg–H–F system for thermochemical energy storage applications
Source: Royal Society of Chemistry journal article supplement (doi:10.1039/c7cp07433f), 2017-12-19
Supplement: c7cp07433f1.pdf [file c7cp07433f1.pdf]

## Supporting information

Belonging to the manuscript

### Thermodynamics and stability of the Mg-H-F system for thermochemical energy storage applications

M. S. Tortoza,<sup>a</sup> T. D. Humphries,<sup>a\*</sup> D. A. Sheppard,<sup>a</sup> M. Paskevicius,<sup>a</sup> M. R. Rowles,<sup>a</sup> M. V. Sofianos,<sup>a</sup> K. F. Aguey-Zinsou<sup>b</sup> and C. E. Buckley<sup>a</sup>

<sup>a</sup>. Department of Physics and Astronomy, Fuels and Energy Technology Institute, Curtin University, GPO Box U1987, Perth, WA 6845, Australia.

<sup>b</sup>. Merlin Group, School of Chemical Engineering, The University of New South Wales, Sydney, NSW 2052, Australia.

\* E-mail: [terry\\_humphries81@hotmail.com](mailto:terry_humphries81@hotmail.com)

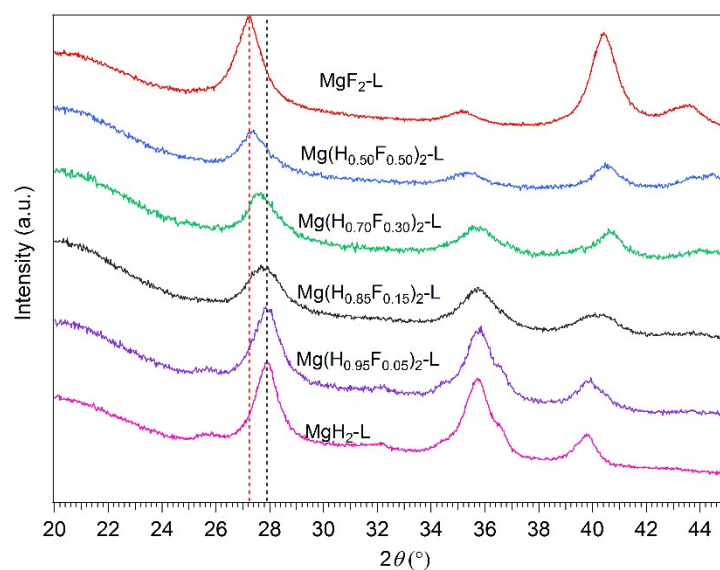

**Fig. S1.** *Ex-situ* XRD data for samples ball milled for 40 hours (L) collected at room temperature.  $\lambda = 1.5418 \text{ \AA}$ . Red and black dot line's refers to main peaks of MgF<sub>2</sub> and MgH<sub>2</sub> respectively.

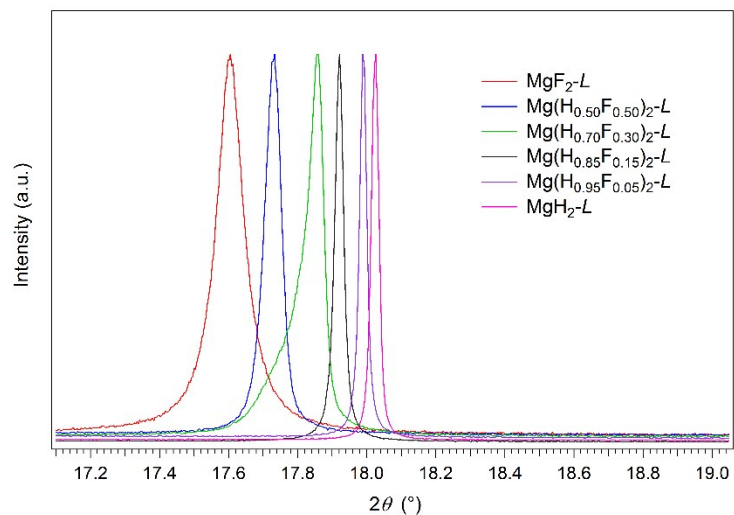

**Fig. S2.** *In situ* SR-XRD at room temperature of  $\text{Mg}(\text{H}_x\text{F}_{1-x})_2\text{-L}$  samples ball milled for 40 hours and annealed.  $\lambda = 1.000389(1) \text{ \AA}$ .

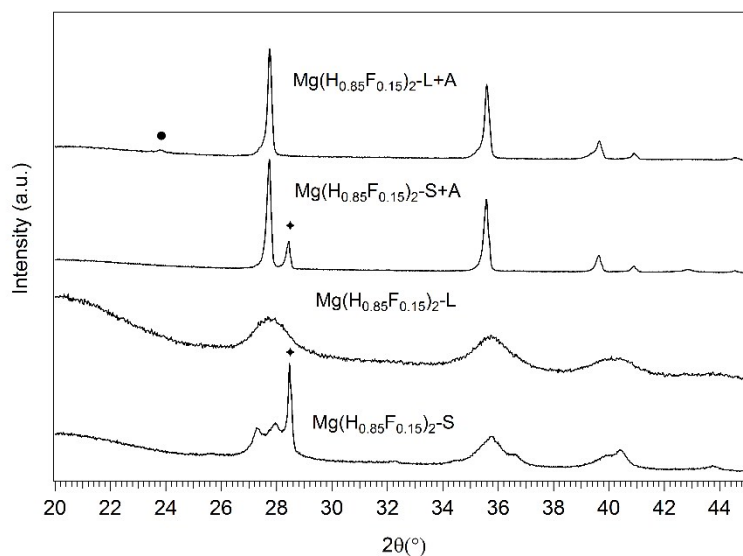

**Fig. S3.** Comparison between SR-XRD of samples ball milled for 10 and 40 hours and then annealed (A). ●= $\text{Mg}_2\text{FeH}_6$ , ◆=Si.  $\lambda = 1.5418 \text{ \AA}$ , at room temperature.

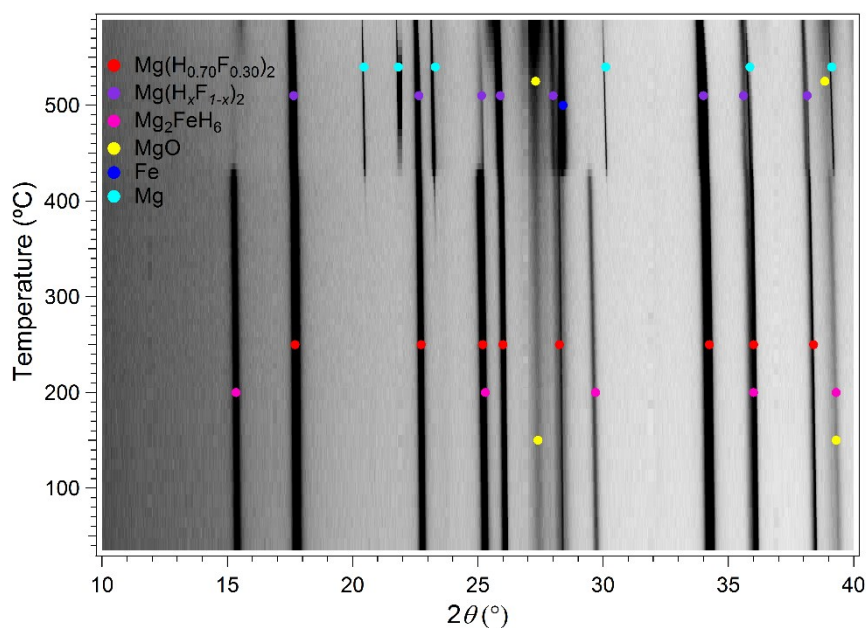

**Fig. S4.** *In situ* XRD for  $\text{Mg}(\text{H}_{0.70}\text{F}_{0.30})_2\text{-L}$  performed under vacuum using a  $\Delta T/\Delta t = 10^\circ\text{C}/\text{min}$  before 200 °C and 5 °C/min after 200 °C.  $\lambda = 1.000389(1) \text{ \AA}$ .

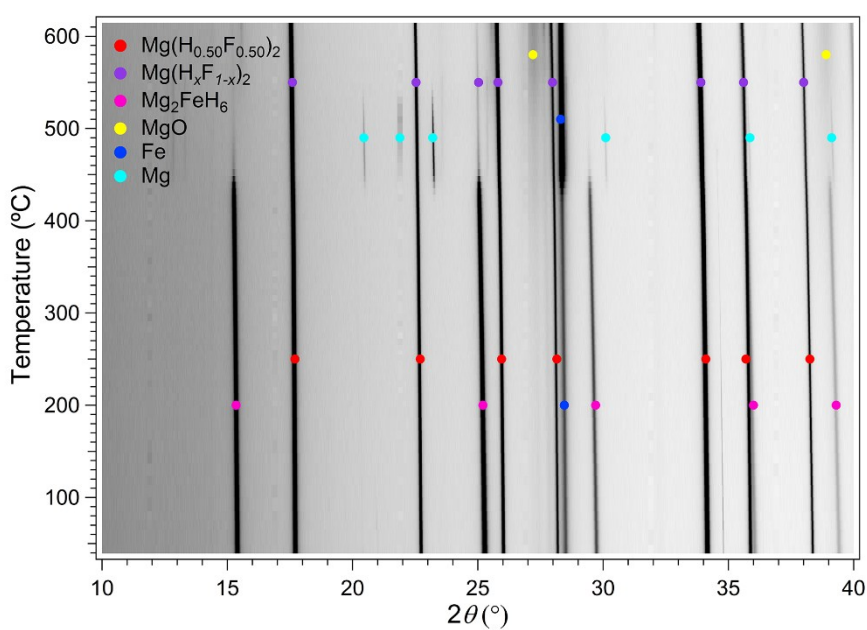

**Fig. S5.** *In situ* XRD for  $\text{Mg}(\text{H}_{0.50}\text{F}_{0.50})_2\text{-L}$  performed under vacuum using a  $\Delta T/\Delta t = 10^\circ\text{C}/\text{min}$  before 200 °C and 5 °C/min after 200 °C.  $\lambda = 1.000389(1) \text{ \AA}$ .

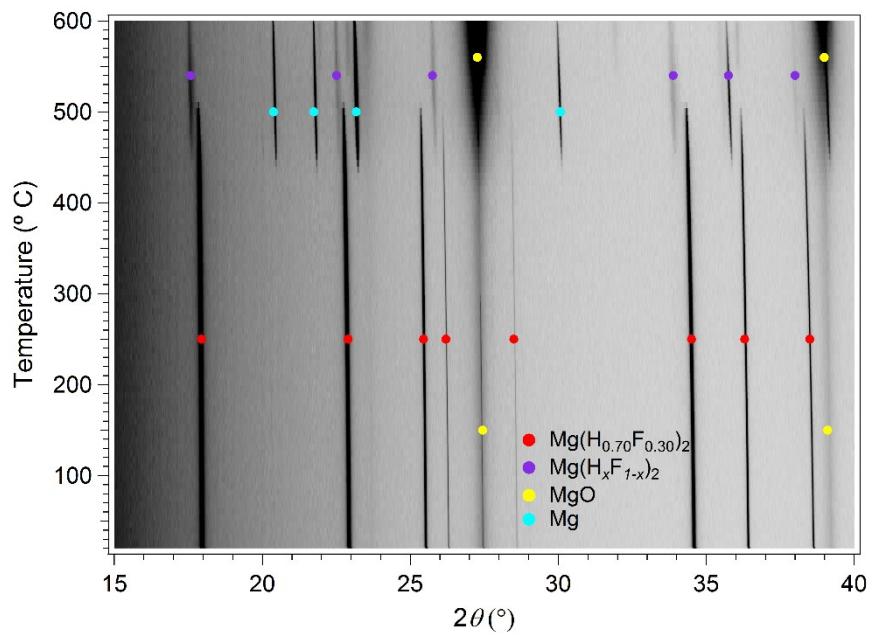

**Fig. S6.** *In situ* XRD for Mg(H<sub>0.95</sub>F<sub>0.05</sub>)<sub>2</sub>-L performed under vacuum using a  $\Delta T/\Delta t = 10^\circ\text{C}/\text{min}$  before 200 °C and 5 °C/min after 200 °C.  $\lambda = 1.000389(1) \text{ \AA}$ .

**Table S1.** Summary of parameters and data collected from PCT desorption measurements of Mg(H<sub>0.85</sub>F<sub>0.15</sub>)<sub>2</sub>-S Pressure and H<sub>2</sub> wt% uncertainties

| Temperature (°C) | Observed Desorption H <sub>2</sub> (wt%) | Final Pressure (bar) | Theoretical H <sub>2</sub> wt% | Difference between observed vs theoretical H <sub>2</sub> wt% |
|------------------|------------------------------------------|----------------------|--------------------------------|---------------------------------------------------------------|
| 438              | 4.57 ± 0.14                              | 14.5                 | 5.4                            | 0.83                                                          |
| 444              | 4.37 ± 0.29                              | 24.1                 | 5.4                            | 1.03                                                          |
| 450              | 4.85 ± 0.19                              | 4                    | 5.4                            | 0.55                                                          |
| 461              | 4.61 ± 0.15                              | 19.8                 | 5.4                            | 0.79                                                          |

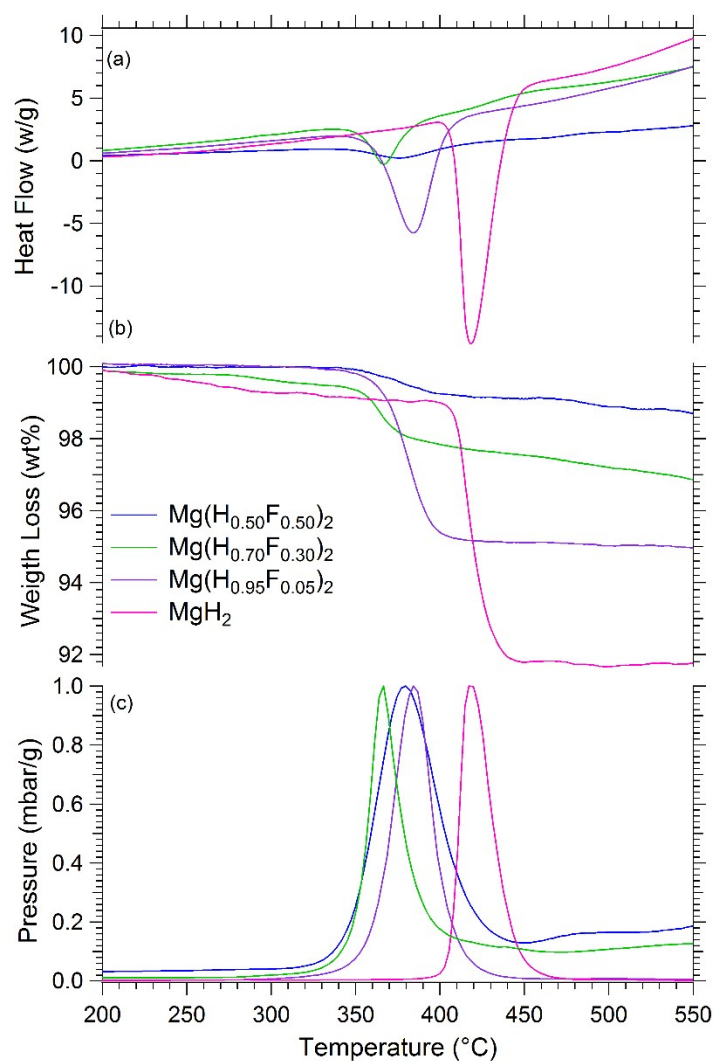

**Fig. S7.** Simultaneous thermal analysis of  $\text{Mg}(\text{H}_x\text{F}_{1-x})_2\text{-L}$  samples by (a) DSC, (b) TGA and (c) MS.  $\Delta T/\Delta t = 10\text{ }^{\circ}\text{C}/\text{min}$ . DSC and MS data are normalised to the mass of the sample.

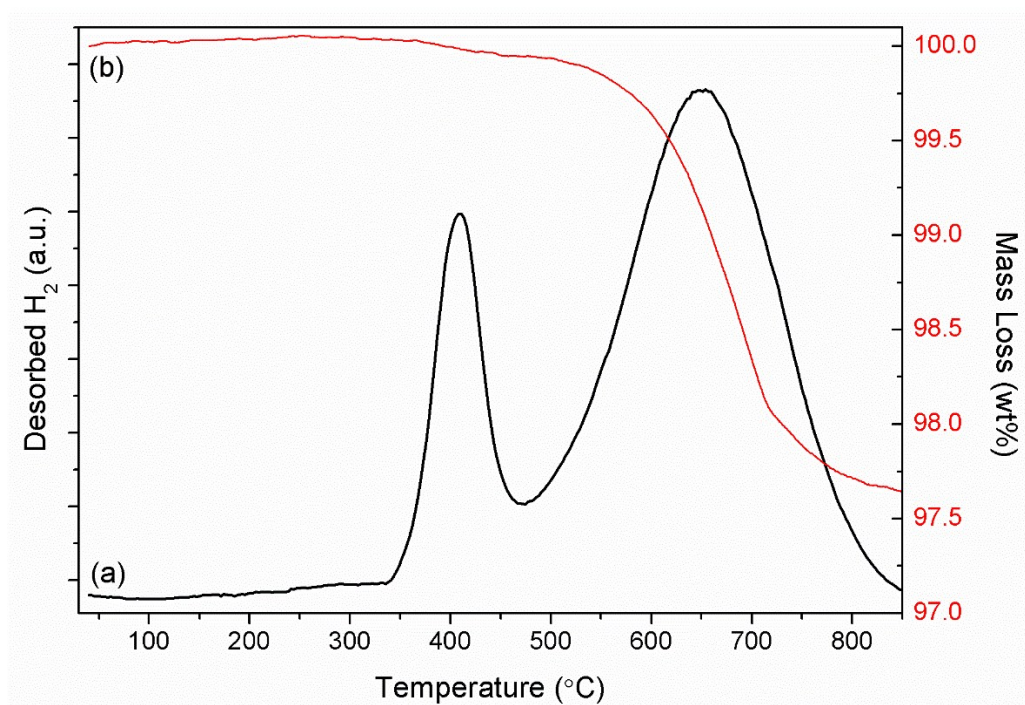

**Fig. S8.** Simultaneous thermal analysis of  $\text{Mg}(\text{H}_{0.50}\text{F}_{0.50})\text{-L}$  by (a) MS and (b) TGA.  $\Delta T/\Delta t = 10^{\circ}\text{C}/\text{min}$ .

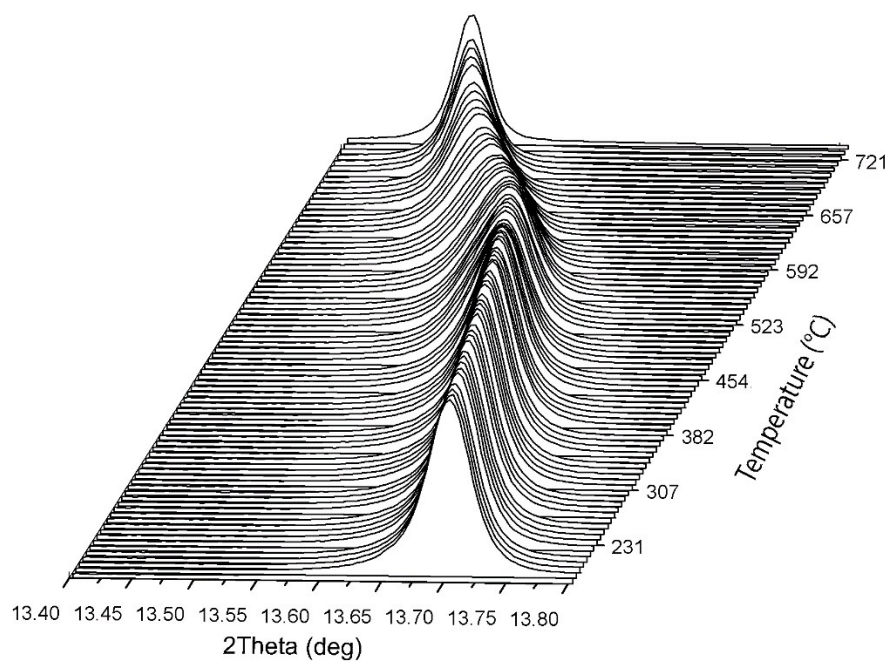

**Fig. S9.** In situ XRD for  $\text{Mg}(\text{H}_{0.50}\text{F}_{0.50})\text{-L}$ .  $\lambda = 0.774541(1) \text{ \AA}$ .
